# Supplementary material for: Pesticide Contamination of Potable Water and Its Correlation with Water Quality in Different Regions of Punjab, Pakistan
Source: MDPI journal article supplement (doi:10.3390/w15030543), 2023-01-30
Supplement: s1 [file s1]

**Table S1.** Analysis of variance (mean square) for the effect of seasons in different regions of Punjab regarding water quality parameters.

| Source      | Degree of freedom | Mean squares |           |             |
|-------------|-------------------|--------------|-----------|-------------|
|             |                   | pH           | EC        | Temperature |
| Season (S)  | 1                 | 0.21904**    | 3122984** | 1420.710**  |
| Regions (R) | 2                 | 0.00561      | 482927    | 0.710**     |
| S × R       | 2                 | 0.00258      | 210042    | 0.470*      |
| Error       | 84                | 0.01351      | 305991    | 0.099       |
| Total       | 89                |              |           |             |

NS = Non-significant (P>0.05); \* = Significant (P<0.05); \*\* = Highly significant (P<0.01); Water quality parameters= pH, EC (Electrical conductivity (μS), Temperature(°C) Seasons=winter and summer; Regions=Core area, Non-core area, Marginal area

**Table S2.** Analysis of variance (mean square) for the effect of seasons in different regions for neonicotinoids pesticide residues in potable water.

| Source      | Degree of freedom | Mean squares |              |                      |                      |           |
|-------------|-------------------|--------------|--------------|----------------------|----------------------|-----------|
|             |                   | Thiamethoxam | Imidacloprid | Thiacloprid          | Acetamiprid          | Fipronil  |
| Season (S)  | 1                 | 21917796**   | 25637454*    | 1226111**            | 1982532*             | 254409**  |
| Regions (R) | 2                 | 182703534**  | 99975468**   | 2093291**            | 9328416**            | 2192363** |
| S × R       | 2                 | 20279626**   | 13067077*    | 176068 <sup>NS</sup> | 849659 <sup>NS</sup> | 173360**  |
| Error       | 84                | 1792854      | 4104954      | 123239               | 477318               | 31399     |
| Total       | 89                |              |              |                      |                      |           |

NS = Non-significant (P>0.05); \* = Significant (P<0.05); \*\* = Highly significant (P<0.01)  
Seasons=winter and summer; Regions=Core area, Non-core area, Marginal area

**Table S3.** Analysis of variance (mean square) for the effect of seasons in different regions for organophosphates and carbamates pesticide residues in potable water.

| Source      | Degree of freedom | Mean squares |            |              |            |              |
|-------------|-------------------|--------------|------------|--------------|------------|--------------|
|             |                   | Triazophos   | Profenofos | Chlorpyrifos | Carbaryl   | Cypermethrin |
| Season (S)  | 1                 | 21429**      | 42581891** | 14969164**   | 9758654**  | 1828956**    |
| Regions (R) | 2                 | 73399**      | 84884012** | 96636756**   | 64494302** | 12660383**   |
| S × R       | 2                 | 8229**       | 14895825** | 11747829**   | 6449233**  | 1421680**    |
| Error       | 84                | 1250         | 641630     | 967921       | 907020     | 110517       |
| Total       | 89                |              |            |              |            |              |

NS = Non-significant (P>0.05); \* = Significant (P<0.05); \*\* = Highly significant (P<0.01)  
Seasons=Winter and Summer; Regions=Core area, Non-core area, Marginal area
